# Supplementary material for: Sex Differences in the Age of Diagnosis for Cardiovascular Disease and Its Risk Factors Among US Adults: Trends From 2008 to 2017, the Medical Expenditure Panel Survey
Source: PubMed Central journal article supplement — J Am Heart Assoc. 2020 Nov 30;9(24):e018764. doi: 10.1161/JAHA.120.018764 (PMC7955360; doi:10.1161/jaha.120.018764), 2020-11-30
Supplement: JAH3-9-e018764-s001.pdf [file JAH3-9-e018764-s001.pdf]

# **SUPPLEMENTAL MATERIAL**

## **Data S1.**

**DESCRIPTION OF THE MEPS AS REPRESENTED ON THE MEPS OFFICIAL WEBSITE:** [https://www.meps.ahrq.gov/mepsweb/about\\_meps/survey\\_back.jsp](https://www.meps.ahrq.gov/mepsweb/about_meps/survey_back.jsp)

“The Medical Expenditure Panel Survey, which began in 1996, is a set of large-scale surveys of families and individuals, their medical providers (doctors, hospitals, pharmacies, etc.), and employers across the United States. MEPS collects data on the specific health services that Americans use, how frequently they use them, the cost of these services, and how they are paid for, as well as data on the cost, scope, and breadth of health insurance held by and available to U.S. workers.

### **Major MEPS Components**

MEPS currently has two major components: the Household Component and the Insurance Component. The Household Component provides data from individual households and their members, which is supplemented by data from their medical providers. The Insurance Component is a separate survey of employers that provides data on employer-based health insurance.

#### **Household Component**

The Household Component (HC) collects data from a sample of families and individuals in selected communities across the United States, drawn from a nationally representative subsample of households that participated in the prior year's National Health Interview Survey (conducted by the National Center for Health Statistics).

During the household interviews, MEPS collects detailed information for each person in the household on the following: demographic characteristics, health conditions, health status, use of medical services, charges and source of payments, access to care, satisfaction with care, health insurance coverage, income, and employment.

The panel design of the survey, which features several rounds of interviewing covering two full calendar years, makes it possible to determine how changes in respondents' health status, income, employment, eligibility for public and private insurance coverage, use of services, and payment for care are related.

The HC expenditures have been projected to future years by selected demographic characteristics by source of payment and type of service.

HC data are available on the MEPS Web site in data tables, downloadable data files (person, job, event, or condition level), annually projected expenditures through 2016, and interactive data tools, as well as in publications using HC data.

#### **Insurance component**

The Insurance Component (IC) collects data from a sample of private and public sector employers on the health insurance plans they offer their employees. The survey is also known as the Health Insurance Cost Study.

The collected data include the number and types of private insurance plans offered (if any), premiums, contributions by employers and employees, eligibility requirements, benefits associated with these plans, and employer characteristics.

IC estimates are available on the MEPS Web site in tabular form for national, regional, state, and metropolitan areas, as well as in publications using IC data and interactive data tools. IC data files are not available for public release.

### **Other MEPS components**

MEPS also includes a Medical Provider Component (MPC), which covers hospitals, physicians, home health care providers, and pharmacies identified by MEPS-HC respondents. Its purpose is to supplement and/or replace information received from the MEPS-HC respondents.

Data files containing only this supplemental respondent information are not available, but the information is incorporated into the MEPS-HC data files.

In 1996 only, MEPS included a Nursing Home Component (NHC) that gathered information from a sample of nursing homes and residents nationwide on the characteristics of the facilities and services offered; expenditures and sources of payment on an individual resident level; and resident characteristics, including functional limitation, cognitive impairment, age, income, and insurance coverage. The NHC also collected data on the availability and use of community-based care prior to admission to nursing homes. For reasons of confidentiality, NHC data are available only at the Data Center located at AHRQ or at one of the Federal Statistical Research Data Centers.

The National Center for Health Statistics (NCHS) provides information on the NCHS National Nursing Home Survey (NNHS), a continuing series of national sample surveys of nursing homes, their residents, and their staff that have been conducted in 1973–74, 1977, 1985, 1995, 1997, and 1999.”

**Table S1. Sex differences in the age of diagnosis of cardiovascular disease & its risk factors, stratified by race/ethnicity: Trends from 2008-2017 among non Hispanic whites.**

| Year                                  | Age of diagnosis     |                                |                       |
|---------------------------------------|----------------------|--------------------------------|-----------------------|
|                                       | Men                  | Women                          | Total                 |
| <b>NON HISPANIC WHITE</b>             |                      |                                |                       |
| <b>CORONARY HEART DISEASE</b>         |                      |                                |                       |
| 2008                                  | 56.6                 | 60.3                           | 58.1                  |
| 2009                                  | 58.2                 | 59.9                           | 58.8                  |
| 2010                                  | 57.9                 | 60.5                           | 58.9                  |
| 2011                                  | 58.3                 | 61.9                           | 59.6                  |
| 2012                                  | 59.2                 | 61.4                           | 60.0                  |
| 2013                                  | 58.3                 | 61.4                           | 59.5                  |
| 2014                                  | 58.6                 | 60.8                           | 59.4                  |
| 2015                                  | 57.7                 | 61.3                           | 59.0                  |
| 2016                                  | 57.7                 | 61.8                           | 59.1                  |
| 2017                                  | 58.7                 | 61.1                           | 59.5                  |
| <b>P for trend</b>                    | 0.37                 | 0.27                           | 0.23                  |
| <b>Annual change in years, 95% CI</b> | 0.08 (-0.10 to 0.27) | 0.14 (-0.11 to 0.38)           | 0.09 (-0.06 to 0.24)  |
| <b>STROKE</b>                         |                      |                                |                       |
| 2008                                  | 58.6                 | 59.3                           | 59.0                  |
| 2009                                  | 59.4                 | 60.8                           | 60.2                  |
| 2010                                  | 59.9                 | 61.8                           | 60.9                  |
| 2011                                  | 59.6                 | 60.6                           | 60.1                  |
| 2012                                  | 59.1                 | 59.8                           | 59.5                  |
| 2013                                  | 59.9                 | 59.1                           | 59.5                  |
| 2014                                  | 61.6                 | 59.3                           | 60.3                  |
| 2015                                  | 59.6                 | 56.3                           | 57.8                  |
| 2016                                  | 60.5                 | 56.8                           | 58.6                  |
| 2017                                  | 60.2                 | 59.2                           | 59.7                  |
| <b>P for trend</b>                    | 0.36                 | <b>0.04</b>                    | 0.38                  |
| <b>Annual change in years, 95% CI</b> | 0.16 (-0.19 to 0.52) | <b>-0.37 (-0.75 to -0.003)</b> | -0.12 (-0.38 to 0.14) |
| <b>HYPERCHOLESTEROLEMIA</b>           |                      |                                |                       |
| 2008                                  | 49.9                 | 53.5                           | 51.7                  |
| 2009                                  | 49.5                 | 52.7                           | 51.1                  |
| 2010                                  | 49.3                 | 52.3                           | 50.8                  |
| 2011                                  | 49.8                 | 52.6                           | 51.1                  |
| 2012                                  | 49.9                 | 52.8                           | 51.3                  |
| 2013                                  | 49.9                 | 52.5                           | 51.2                  |
| 2014                                  | 49.3                 | 52.0                           | 50.6                  |
| 2015                                  | 48.8                 | 51.5                           | 50.1                  |
| 2016                                  | 49.3                 | 51.6                           | 50.4                  |

|                                       |                       |                               |                               |
|---------------------------------------|-----------------------|-------------------------------|-------------------------------|
| <b>2017</b>                           | 49.3                  | 51.7                          | 50.5                          |
| <b>P for trend</b>                    | 0.27                  | <b>0.001</b>                  | <b>0.004</b>                  |
| <b>Annual change in years, 95% CI</b> | -0.06 (-0.16 to 0.05) | <b>-0.18 (-0.29 to -0.08)</b> | <b>-0.12 (-0.21 to -0.04)</b> |
| <b>HYPERTENSION</b>                   |                       |                               |                               |
| <b>2008</b>                           | 48.1                  | 51.3                          | 49.7                          |
| <b>2009</b>                           | 47.6                  | 50.8                          | 49.2                          |
| <b>2010</b>                           | 47.4                  | 50.3                          | 48.8                          |
| <b>2011</b>                           | 48.0                  | 50.8                          | 49.3                          |
| <b>2012</b>                           | 47.9                  | 51.0                          | 49.4                          |
| <b>2013</b>                           | 47.8                  | 50.6                          | 49.1                          |
| <b>2014</b>                           | 47.8                  | 49.8                          | 48.7                          |
| <b>2015</b>                           | 47.6                  | 50.1                          | 48.8                          |
| <b>2016</b>                           | 46.9                  | 49.9                          | 48.3                          |
| <b>2017</b>                           | 46.9                  | 49.8                          | 48.2                          |
| <b>P for trend</b>                    | 0.09                  | <b>0.01</b>                   | <b>0.004</b>                  |
| <b>Annual change in years, 95% CI</b> | -0.09 (-0.21 to 0.02) | <b>-0.14 (-0.26 to -0.03)</b> | <b>-0.13 (-0.21 to -0.04)</b> |

**Table S2. Sex differences in the age of diagnosis of cardiovascular disease & its risk factors, stratified by race/ethnicity: Trends from 2008-2017 among non-Hispanic Blacks.**

| Year                                  | Age of diagnosis     |                       |                       |
|---------------------------------------|----------------------|-----------------------|-----------------------|
|                                       | Men                  | Women                 | Total                 |
| <b>BLACKS</b>                         |                      |                       |                       |
| <b>CORONARY HEART DISEASE</b>         |                      |                       |                       |
| 2008                                  | 55.5                 | 56.1                  | 55.8                  |
| 2009                                  | 51.7                 | 53.8                  | 52.9                  |
| 2010                                  | 51.8                 | 55.4                  | 53.7                  |
| 2011                                  | 53.3                 | 55.8                  | 54.6                  |
| 2012                                  | 55.4                 | 57.5                  | 56.5                  |
| 2013                                  | 53.1                 | 55.4                  | 54.3                  |
| 2014                                  | 52.8                 | 54.2                  | 53.6                  |
| 2015                                  | 53.9                 | 53.9                  | 53.9                  |
| 2016                                  | 54.3                 | 54.4                  | 54.3                  |
| 2017                                  | 54.6                 | 54.7                  | 54.6                  |
| <b>P for trend</b>                    | 0.61                 | 0.46                  | 0.81                  |
| <b>Annual change in years, 95% CI</b> | 0.10 (-0.30 to 0.51) | -0.14 (-0.53 to 0.24) | -0.03 (-0.31 to 0.24) |
| <b>STROKE</b>                         |                      |                       |                       |
| 2008                                  | 53.8                 | 54.2                  | 54.1                  |
| 2009                                  | 54.0                 | 52.8                  | 53.3                  |
| 2010                                  | 52.8                 | 55.0                  | 54.1                  |
| 2011                                  | 57.6                 | 54.4                  | 55.7                  |
| 2012                                  | 56.1                 | 51.2                  | 53.3                  |
| 2013                                  | 55.1                 | 50.2                  | 52.1                  |
| 2014                                  | 55.7                 | 52.6                  | 54.0                  |
| 2015                                  | 55.7                 | 54.7                  | 55.1                  |
| 2016                                  | 55.8                 | 54.5                  | 55.1                  |
| 2017                                  | 57.2                 | 54.9                  | 55.9                  |
| <b>P for trend</b>                    | 0.19                 | 0.72                  | 0.24                  |
| <b>Annual change in years, 95% CI</b> | 0.29 (-0.15 to 0.74) | 0.07 (-0.34 to 0.49)  | 0.18 (-0.12 to 0.48)  |
| <b>HYPERCHOLESTEROLEMIA</b>           |                      |                       |                       |
| 2008                                  | 49.0                 | 49.9                  | 49.5                  |
| 2009                                  | 48.7                 | 49.4                  | 49.1                  |
| 2010                                  | 48.4                 | 50.3                  | 49.5                  |
| 2011                                  | 48.4                 | 51.1                  | 49.9                  |
| 2012                                  | 49.3                 | 50.4                  | 49.9                  |
| 2013                                  | 49.5                 | 49.8                  | 49.7                  |
| 2014                                  | 49.1                 | 50.9                  | 50.1                  |
| 2015                                  | 48.7                 | 51.0                  | 49.9                  |
| 2016                                  | 48.5                 | 49.6                  | 49.1                  |

|                                       |                      |                       |                      |
|---------------------------------------|----------------------|-----------------------|----------------------|
| <b>2017</b>                           | 49.7                 | 49.6                  | 49.7                 |
| <b>P for trend</b>                    | 0.62                 | 0.96                  | 0.75                 |
| <b>Annual change in years, 95% CI</b> | 0.05 (-0.15 to 0.25) | 0.003 (-0.18 to 0.19) | 0.02 (-0.12 to 0.16) |
| <b>HYPERTENSION</b>                   |                      |                       |                      |
| <b>2008</b>                           | 44.5                 | 43.7                  | 44.0                 |
| <b>2009</b>                           | 44.3                 | 43.2                  | 43.6                 |
| <b>2010</b>                           | 43.2                 | 43.3                  | 43.3                 |
| <b>2011</b>                           | 44.8                 | 43.7                  | 44.2                 |
| <b>2012</b>                           | 45.3                 | 43.7                  | 44.4                 |
| <b>2013</b>                           | 43.8                 | 43.1                  | 43.4                 |
| <b>2014</b>                           | 43.7                 | 43.2                  | 43.4                 |
| <b>2015</b>                           | 44.2                 | 43.0                  | 43.5                 |
| <b>2016</b>                           | 43.7                 | 43.6                  | 43.6                 |
| <b>2017</b>                           | 45.3                 | 43.8                  | 44.4                 |
| <b>P for trend</b>                    | 0.83                 | 0.98                  | 0.85                 |
| <b>Annual change in years, 95% CI</b> | 0.02 (-0.15 to 0.19) | 0.001 (-0.13 to 0.14) | 0.01 (-0.11 to 0.13) |

**Table S3. Sex differences in the age of diagnosis of cardiovascular disease & its risk factors, stratified by race/ethnicity: Trends from 2008-2017 among Asians.**

| Year                                  | Age of diagnosis      |                       |                       |
|---------------------------------------|-----------------------|-----------------------|-----------------------|
|                                       | Men                   | Women                 | Total                 |
| <b>ASIAN</b>                          |                       |                       |                       |
| <b>CORONARY HEART DISEASE</b>         |                       |                       |                       |
| 2008                                  | 52.2                  | 59.7                  | 55.6                  |
| 2009                                  | 52.5                  | 59.0                  | 55.5                  |
| 2010                                  | 58.9                  | 56.8                  | 57.7                  |
| 2011                                  | 61.9                  | 56.3                  | 59.5                  |
| 2012                                  | 58.9                  | 58.9                  | 58.9                  |
| 2013                                  | 55.6                  | 62.1                  | 58.1                  |
| 2014                                  | 53.9                  | 60.6                  | 55.2                  |
| 2015                                  | 54.3                  | 58.0                  | 55.3                  |
| 2016                                  | 56.3                  | 62.6                  | 58.3                  |
| 2017                                  | 58.0                  | 65.7                  | 60.2                  |
| <b>P for trend</b>                    | 0.83                  | 0.22                  | 0.58                  |
| <b>Annual change in years, 95% CI</b> | 0.10 (-0.81 to 1.01)  | 0.67 (-0.43 to 1.78)  | 0.21 (-0.54 to 0.96)  |
| <b>STROKE</b>                         |                       |                       |                       |
| 2008                                  | 62.5                  | 65.7                  | 64.2                  |
| 2009                                  | 67.6                  | 63.4                  | 65.6                  |
| 2010                                  | 57.1                  | 61.3                  | 60.0                  |
| 2011                                  | 58.2                  | 62.3                  | 60.1                  |
| 2012                                  | 59.1                  | 51.7                  | 56.7                  |
| 2013                                  | 56.5                  | 60.9                  | 58.4                  |
| 2014                                  | 57.2                  | 60.6                  | 58.7                  |
| 2015                                  | 59.0                  | 61.2                  | 60.2                  |
| 2016                                  | 61.4                  | 58.5                  | 59.7                  |
| 2017                                  | 61.3                  | 62.8                  | 62.0                  |
| <b>P for trend</b>                    | 0.65                  | 0.47                  | 0.46                  |
| <b>Annual change in years, 95% CI</b> | -0.27 (-1.48 to 0.93) | -0.39 (-1.50 to 0.71) | -0.33 (-1.24 to 0.57) |
| <b>HYPERCHOLESTEROLEMIA</b>           |                       |                       |                       |
| 2008                                  | 47.1                  | 51.3                  | 49.1                  |
| 2009                                  | 46.9                  | 51.1                  | 49.0                  |
| 2010                                  | 46.8                  | 51.7                  | 49.1                  |
| 2011                                  | 48.0                  | 52.9                  | 50.3                  |
| 2012                                  | 47.1                  | 53.1                  | 50.0                  |
| 2013                                  | 47.4                  | 52.4                  | 49.7                  |
| 2014                                  | 47.8                  | 53.1                  | 50.1                  |
| 2015                                  | 46.4                  | 53.7                  | 49.6                  |
| 2016                                  | 46.5                  | 53.8                  | 49.8                  |



|                                       |                        |                      |                      |
|---------------------------------------|------------------------|----------------------|----------------------|
| <b>2017</b>                           | 47.6                   | 53.1                 | 49.9                 |
| <b>P for trend</b>                    | 0.95                   | 0.13                 | 0.56                 |
| <b>Annual change in years, 95% CI</b> | -0.01 (-0.32 to 0.29)  | 0.27 (-0.09 to 0.63) | 0.08 (-0.19 to 0.35) |
| <b>HYPERTENSION</b>                   |                        |                      |                      |
| <b>2008</b>                           | 46.9                   | 51.5                 | 49.2                 |
| <b>2009</b>                           | 47.1                   | 52.5                 | 49.7                 |
| <b>2010</b>                           | 45.8                   | 52.7                 | 49.2                 |
| <b>2011</b>                           | 48.5                   | 51.4                 | 50.1                 |
| <b>2012</b>                           | 48.8                   | 51.2                 | 50.0                 |
| <b>2013</b>                           | 48.4                   | 52.4                 | 50.2                 |
| <b>2014</b>                           | 49.9                   | 51.9                 | 50.9                 |
| <b>2015</b>                           | 47.2                   | 51.1                 | 49.2                 |
| <b>2016</b>                           | 46.7                   | 53.5                 | 50.2                 |
| <b>2017</b>                           | 46.5                   | 53.1                 | 49.6                 |
| <b>P for trend</b>                    | 0.99                   | 0.59                 | 0.71                 |
| <b>Annual change in years, 95% CI</b> | -0.001 (-0.34 to 0.34) | 0.10 (-0.26 to 0.45) | 0.05 (-0.21 to 0.31) |

**Table S4. Sex differences in the age of diagnosis of cardiovascular disease & its risk factors, stratified by race/ethnicity: Trends from 2008-2017 among Hispanics.**

| Year                                  | Age of diagnosis     |                       |                       |
|---------------------------------------|----------------------|-----------------------|-----------------------|
|                                       | Men                  | Women                 | Total                 |
| <b>HISPANIC</b>                       |                      |                       |                       |
| <b>CORONARY HEART DISEASE</b>         |                      |                       |                       |
| 2008                                  | 56.9                 | 54.9                  | 55.9                  |
| 2009                                  | 53.3                 | 53.9                  | 53.6                  |
| 2010                                  | 53.9                 | 54.1                  | 54.0                  |
| 2011                                  | 50.8                 | 55.4                  | 52.7                  |
| 2012                                  | 53.5                 | 52.7                  | 53.2                  |
| 2013                                  | 52.0                 | 51.8                  | 51.9                  |
| 2014                                  | 52.0                 | 53.3                  | 52.6                  |
| 2015                                  | 56.7                 | 54.8                  | 55.8                  |
| 2016                                  | 57.5                 | 53.9                  | 55.8                  |
| 2017                                  | 56.4                 | 54.4                  | 55.5                  |
| <b>P for trend</b>                    | 0.22                 | 0.89                  | 0.53                  |
| <b>Annual change in years, 95% CI</b> | 0.28 (-0.17 to 0.72) | -0.04 (-0.63 to 0.55) | 0.12 (-0.27 to 0.51)  |
| <b>STROKE</b>                         |                      |                       |                       |
| 2008                                  | 54.6                 | 54.7                  | 54.6                  |
| 2009                                  | 53.5                 | 53.5                  | 53.5                  |
| 2010                                  | 53.4                 | 53.6                  | 53.5                  |
| 2011                                  | 52.5                 | 52.0                  | 52.2                  |
| 2012                                  | 53.8                 | 52.5                  | 53.1                  |
| 2013                                  | 54.8                 | 53.9                  | 54.3                  |
| 2014                                  | 53.7                 | 53.3                  | 53.5                  |
| 2015                                  | 55.3                 | 52.2                  | 53.5                  |
| 2016                                  | 55.6                 | 53.1                  | 53.9                  |
| 2017                                  | 54.3                 | 50.0                  | 51.6                  |
| <b>P for trend</b>                    | 0.64                 | 0.45                  | 0.63                  |
| <b>Annual change in years, 95% CI</b> | 0.16 (-0.52 to 0.84) | -0.29 (-1.06 to 0.47) | -0.12 (-0.64 to 0.39) |
| <b>HYPERCHOLESTEROLEMIA</b>           |                      |                       |                       |
| 2008                                  | 45.5                 | 48.3                  | 46.9                  |
| 2009                                  | 44.7                 | 48.6                  | 46.6                  |
| 2010                                  | 45.1                 | 48.1                  | 46.6                  |
| 2011                                  | 43.9                 | 47.7                  | 45.7                  |
| 2012                                  | 44.3                 | 48.6                  | 46.4                  |
| 2013                                  | 45.3                 | 48.1                  | 46.7                  |
| 2014                                  | 45.5                 | 47.9                  | 46.7                  |
| 2015                                  | 44.5                 | 48.5                  | 46.5                  |
| 2016                                  | 45.1                 | 48.8                  | 46.9                  |

|                                       |                       |                      |                       |
|---------------------------------------|-----------------------|----------------------|-----------------------|
| <b>2017</b>                           | 45.5                  | 48.8                 | 47.1                  |
| <b>P for trend</b>                    | 0.67                  | 0.59                 | 0.54                  |
| <b>Annual change in years, 95% CI</b> | 0.04 (-0.16 to 0.25)  | 0.05 (-0.14 to 0.25) | 0.46 (-0.11 to 0.19)  |
| <b>HYPERTENSION</b>                   |                       |                      |                       |
| <b>2008</b>                           | 45.9                  | 45.5                 | 45.7                  |
| <b>2009</b>                           | 46.2                  | 45.8                 | 46.0                  |
| <b>2010</b>                           | 44.5                  | 46.1                 | 45.3                  |
| <b>2011</b>                           | 44.8                  | 47.1                 | 45.9                  |
| <b>2012</b>                           | 44.9                  | 46.8                 | 45.9                  |
| <b>2013</b>                           | 44.5                  | 47.1                 | 45.8                  |
| <b>2014</b>                           | 44.4                  | 46.3                 | 45.3                  |
| <b>2015</b>                           | 44.6                  | 46.3                 | 45.4                  |
| <b>2016</b>                           | 45.2                  | 46.6                 | 45.9                  |
| <b>2017</b>                           | 44.7                  | 47.1                 | 45.9                  |
| <b>P for trend</b>                    | 0.35                  | 0.32                 | 0.98                  |
| <b>Annual change in years, 95% CI</b> | -0.11 (-0.33 to 0.12) | 0.11 (-0.11 to 0.32) | -0.02 (-0.16 to 0.16) |

**Table S5. Sex differences in the prevalence and age of diagnosis of cardiovascular disease & its risk factors, stratified by age categories: Trends from 2008-2017 among young adults.**

| Year                                  | Age of diagnosis      |                       |                       |
|---------------------------------------|-----------------------|-----------------------|-----------------------|
|                                       | Men                   | Women                 | Total                 |
| <b>Young (age 18-39 years)</b>        |                       |                       |                       |
| <b>CORONARY HEART DISEASE</b>         |                       |                       |                       |
| 2008                                  | 30.9                  | 27.2                  | 29.0                  |
| 2009                                  | 28.3                  | 28.2                  | 28.3                  |
| 2010                                  | 29.6                  | 30.2                  | 29.9                  |
| 2011                                  | 26.9                  | 30.3                  | 28.2                  |
| 2012                                  | 26.8                  | 31.9                  | 29.8                  |
| 2013                                  | 29.9                  | 24.1                  | 26.7                  |
| 2014                                  | 30.2                  | 25.8                  | 29.2                  |
| 2015                                  | 30.1                  | 29.6                  | 30.0                  |
| 2016                                  | 29.2                  | 27.2                  | 28.3                  |
| 2017                                  | 26.8                  | 28.9                  | 27.9                  |
| <b>P for trend</b>                    | 0.92                  | 0.81                  | 0.83                  |
| <b>Annual change in years, 95% CI</b> | -0.02 (-0.43 to 0.39) | -0.09 (-0.79 to 0.63) | -0.04 (-0.43 to 0.35) |
| <b>STROKE</b>                         |                       |                       |                       |
| 2008                                  | 25.9                  | 28.8                  | 27.6                  |
| 2009                                  | 27.9                  | 27.5                  | 27.7                  |
| 2010                                  | 28.1                  | 26.6                  | 27.7                  |
| 2011                                  | 27.3                  | 26.6                  | 26.9                  |
| 2012                                  | 28.2                  | 26.4                  | 27.2                  |
| 2013                                  | 29.5                  | 27.7                  | 28.3                  |
| 2014                                  | 30.8                  | 28.7                  | 29.1                  |
| 2015                                  | 28.4                  | 26.5                  | 26.9                  |
| 2016                                  | 26.9                  | 27.8                  | 27.5                  |
| 2017                                  | 26.9                  | 27.2                  | 27.1                  |
| <b>P for trend</b>                    | 0.88                  | 0.78                  | 0.91                  |
| <b>Annual change in years, 95% CI</b> | 0.05 (-0.63 to 0.73)  | -0.05 (-0.42 to 0.32) | -0.02 (-0.37 to 0.33) |
| <b>HYPERCHOLESTEROLEMIA</b>           |                       |                       |                       |
| 2008                                  | 29.3                  | 29.0                  | 29.2                  |
| 2009                                  | 29.2                  | 28.8                  | 29.0                  |
| 2010                                  | 29.6                  | 29.2                  | 29.4                  |
| 2011                                  | 29.4                  | 28.9                  | 29.2                  |
| 2012                                  | 29.7                  | 28.8                  | 29.4                  |
| 2013                                  | 29.7                  | 28.5                  | 29.2                  |
| 2014                                  | 29.3                  | 28.6                  | 29.0                  |
| 2015                                  | 29.2                  | 27.7                  | 28.6                  |

|                                       |                       |                               |                                |
|---------------------------------------|-----------------------|-------------------------------|--------------------------------|
| <b>2016</b>                           | 29.8                  | 27.7                          | 28.9                           |
| <b>2017</b>                           | 29.8                  | 28.2                          | 29.1                           |
| <b>P for trend</b>                    | 0.44                  | <b>0.008</b>                  | 0.27                           |
| <b>Annual change in years, 95% CI</b> | 0.04 (-0.06 to 0.13)  | <b>-0.15 (-0.25 to -0.04)</b> | -0.04 (-0.12 to 0.03)          |
| <b>HYPERTENSION</b>                   |                       |                               |                                |
| <b>2008</b>                           | 27.9                  | 28.5                          | 28.2                           |
| <b>2009</b>                           | 27.9                  | 28.1                          | 28.0                           |
| <b>2010</b>                           | 27.6                  | 27.9                          | 27.7                           |
| <b>2011</b>                           | 28.1                  | 27.6                          | 27.9                           |
| <b>2012</b>                           | 27.9                  | 28.0                          | 27.9                           |
| <b>2013</b>                           | 27.6                  | 27.6                          | 27.7                           |
| <b>2014</b>                           | 27.8                  | 27.5                          | 27.7                           |
| <b>2015</b>                           | 27.5                  | 27.3                          | 27.4                           |
| <b>2016</b>                           | 27.8                  | 27.7                          | 27.7                           |
| <b>2017</b>                           | 27.4                  | 26.9                          | 27.2                           |
| <b>P for trend</b>                    | 0.38                  | <b>0.007</b>                  | <b>0.01</b>                    |
| <b>Annual change in years, 95% CI</b> | -0.05 (-0.15 to 0.06) | <b>-0.12 (-0.21 to -0.03)</b> | <b>-0.08 (-0.14 to -0.013)</b> |

**Table S6. Sex differences in the prevalence and age of diagnosis of cardiovascular disease & its risk factors, stratified by age categories: Trends from 2008-2017 among middle aged adults.**

| Year                                  | Age of diagnosis     |                       |                      |
|---------------------------------------|----------------------|-----------------------|----------------------|
|                                       | Men                  | Women                 | Total                |
| <b>Middle aged (age 40-64 years)</b>  |                      |                       |                      |
| <b>CORONARY HEART DISEASE</b>         |                      |                       |                      |
| 2008                                  | 48.0                 | 48.9                  | 48.3                 |
| 2009                                  | 47.9                 | 48.1                  | 47.4                 |
| 2010                                  | 47.6                 | 47.2                  | 47.4                 |
| 2011                                  | 48.0                 | 48.6                  | 48.2                 |
| 2012                                  | 48.8                 | 47.2                  | 48.3                 |
| 2013                                  | 48.1                 | 47.4                  | 47.8                 |
| 2014                                  | 47.5                 | 46.9                  | 47.2                 |
| 2015                                  | 48.1                 | 48.4                  | 48.2                 |
| 2016                                  | 48.3                 | 47.9                  | 48.1                 |
| 2017                                  | 49.3                 | 47.6                  | 48.7                 |
| <b>P for trend</b>                    | 0.36                 | 0.66                  | 0.72                 |
| <b>Annual change in years, 95% CI</b> | 0.07 (-0.09 to 0.23) | -0.06 (-0.32 to 0.20) | 0.03 (-0.12 to 0.17) |
| <b>STROKE</b>                         |                      |                       |                      |
| 2008                                  | 48.2                 | 44.0                  | 46.0                 |
| 2009                                  | 47.7                 | 46.6                  | 47.1                 |
| 2010                                  | 47.7                 | 46.7                  | 47.2                 |
| 2011                                  | 46.4                 | 45.6                  | 46.0                 |
| 2012                                  | 48.7                 | 44.2                  | 46.4                 |
| 2013                                  | 48.8                 | 43.6                  | 46.0                 |
| 2014                                  | 49.6                 | 45.0                  | 47.0                 |
| 2015                                  | 48.5                 | 45.4                  | 46.8                 |
| 2016                                  | 48.3                 | 45.6                  | 46.8                 |
| 2017                                  | 48.4                 | 45.3                  | 46.8                 |
| <b>P for trend</b>                    | 0.36                 | 0.91                  | 0.67                 |
| <b>Annual change in years, 95% CI</b> | 0.12 (-0.14 to 0.37) | -0.015 (0.31 to 0.27) | 0.05 (-0.16 to 0.25) |
| <b>HYPERCHOLESTEROLEMIA</b>           |                      |                       |                      |
| 2008                                  | 46.6                 | 47.9                  | 47.2                 |
| 2009                                  | 46.1                 | 47.3                  | 46.7                 |
| 2010                                  | 46.0                 | 47.1                  | 46.5                 |
| 2011                                  | 46.0                 | 47.1                  | 46.5                 |
| 2012                                  | 46.0                 | 46.9                  | 46.4                 |
| 2013                                  | 45.8                 | 46.4                  | 46.1                 |
| 2014                                  | 45.6                 | 46.2                  | 46.0                 |
| 2015                                  | 44.9                 | 46.2                  | 45.5                 |

|                                       |                               |                               |                               |
|---------------------------------------|-------------------------------|-------------------------------|-------------------------------|
| <b>2016</b>                           | 45.0                          | 45.9                          | 45.4                          |
| <b>2017</b>                           | 44.8                          | 45.7                          | 45.2                          |
| <b>P for trend</b>                    | <b>&lt;0.001</b>              | <b>&lt;0.001</b>              | <b>&lt;0.001</b>              |
| <b>Annual change in years, 95% CI</b> | <b>-0.18 (-0.25 to -0.11)</b> | <b>-0.22 (-0.29 to -0.15)</b> | <b>-0.20 (-0.25 to -0.15)</b> |
| <b>HYPERTENSION</b>                   |                               |                               |                               |
| <b>2008</b>                           | 44.7                          | 45.1                          | 44.9                          |
| <b>2009</b>                           | 44.5                          | 44.6                          | 44.6                          |
| <b>2010</b>                           | 44.5                          | 44.5                          | 44.5                          |
| <b>2011</b>                           | 44.7                          | 45.0                          | 44.8                          |
| <b>2012</b>                           | 44.9                          | 44.7                          | 44.8                          |
| <b>2013</b>                           | 44.6                          | 44.6                          | 44.6                          |
| <b>2014</b>                           | 44.3                          | 44.0                          | 44.2                          |
| <b>2015</b>                           | 44.1                          | 43.9                          | 44.0                          |
| <b>2016</b>                           | 43.9                          | 44.2                          | 44.1                          |
| <b>2017</b>                           | 43.8                          | 44.0                          | 43.9                          |
| <b>P for trend</b>                    | <b>0.01</b>                   | <b>0.009</b>                  | <b>0.001</b>                  |
| <b>Annual change in years, 95% CI</b> | <b>-0.10 (-0.18 to -0.02)</b> | <b>-0.11 (-0.19 to -0.03)</b> | <b>-0.10 (-0.16 to -0.04)</b> |

**Table S7. Sex differences in the prevalence and age of diagnosis of cardiovascular disease & its risk factors, stratified by age categories: Trends from 2008-2017 among older adults.**

| Year                                        | Age of diagnosis       |                       |                               |
|---------------------------------------------|------------------------|-----------------------|-------------------------------|
|                                             | Men                    | Women                 | Total                         |
| <b>Older adults (age 65 years or older)</b> |                        |                       |                               |
| <b>CORONARY HEART DISEASE</b>               |                        |                       |                               |
| 2008                                        | 62.3                   | 65.5                  | 63.7                          |
| 2009                                        | 63.8                   | 65.9                  | 64.6                          |
| 2010                                        | 63.8                   | 65.8                  | 64.7                          |
| 2011                                        | 63.9                   | 66.0                  | 64.8                          |
| 2012                                        | 64.2                   | 65.9                  | 64.9                          |
| 2013                                        | 62.2                   | 66.7                  | 63.9                          |
| 2014                                        | 62.4                   | 65.4                  | 63.6                          |
| 2015                                        | 62.2                   | 63.9                  | 62.9                          |
| 2016                                        | 61.9                   | 64.6                  | 62.9                          |
| 2017                                        | 62.4                   | 64.3                  | 63.1                          |
| <b>P for trend</b>                          | 0.05                   | 0.07                  | <b>0.007</b>                  |
| <b>Annual change in years, 95% CI</b>       | -0.17 (-0.34 to 0.003) | -0.19 (-0.39 to 0.19) | <b>-0.19 (-0.32 to -0.05)</b> |
| <b>STROKE</b>                               |                        |                       |                               |
| 2008                                        | 65.8                   | 68.5                  | 67.3                          |
| 2009                                        | 66.8                   | 68.5                  | 67.8                          |
| 2010                                        | 68.2                   | 67.2                  | 67.6                          |
| 2011                                        | 68.6                   | 67.3                  | 67.9                          |
| 2012                                        | 66.4                   | 67.8                  | 67.2                          |
| 2013                                        | 66.1                   | 67.5                  | 66.8                          |
| 2014                                        | 66.4                   | 69.1                  | 67.9                          |
| 2015                                        | 65.9                   | 65.9                  | 65.9                          |
| 2016                                        | 66.6                   | 65.8                  | 66.2                          |
| 2017                                        | 66.8                   | 66.2                  | 66.5                          |
| <b>P for trend</b>                          | 0.62                   | 0.09                  | 0.09                          |
| <b>Annual change in years, 95% CI</b>       | -0.06 (-0.31 to 0.19)  | -0.25 (-0.54 to 0.04) | -0.17 (-0.36 to 0.03)         |
| <b>HYPERCHOLESTEROLEMIA</b>                 |                        |                       |                               |
| 2008                                        | 63.3                   | 65.0                  | 64.3                          |
| 2009                                        | 62.5                   | 64.1                  | 63.4                          |
| 2010                                        | 61.7                   | 63.4                  | 62.7                          |
| 2011                                        | 61.5                   | 63.0                  | 62.3                          |
| 2012                                        | 60.8                   | 62.9                  | 61.9                          |
| 2013                                        | 60.1                   | 62.2                  | 61.3                          |
| 2014                                        | 59.2                   | 61.4                  | 60.4                          |
| 2015                                        | 58.5                   | 60.9                  | 59.9                          |
| 2016                                        | 58.8                   | 60.9                  | 59.9                          |



|                                       |                               |                               |                               |
|---------------------------------------|-------------------------------|-------------------------------|-------------------------------|
| <b>2017</b>                           | 58.2                          | 60.1                          | 59.2                          |
| <b>P for trend</b>                    | <b>&lt;0.001</b>              | <b>&lt;0.001</b>              | <b>&lt;0.001</b>              |
| <b>Annual change in years, 95% CI</b> | <b>-0.57 (-0.68 to -0.46)</b> | <b>-0.51 (-0.62 to -0.39)</b> | <b>-0.54 (-0.63 to -0.46)</b> |
| <b>HYPERTENSION</b>                   |                               |                               |                               |
| <b>2008</b>                           | 59.2                          | 60.1                          | 59.7                          |
| <b>2009</b>                           | 58.7                          | 59.9                          | 59.4                          |
| <b>2010</b>                           | 58.1                          | 59.1                          | 58.7                          |
| <b>2011</b>                           | 58.7                          | 58.8                          | 58.7                          |
| <b>2012</b>                           | 57.9                          | 58.9                          | 58.5                          |
| <b>2013</b>                           | 57.1                          | 58.3                          | 57.7                          |
| <b>2014</b>                           | 56.7                          | 57.4                          | 57.1                          |
| <b>2015</b>                           | 56.8                          | 57.8                          | 57.3                          |
| <b>2016</b>                           | 55.9                          | 56.9                          | 56.5                          |
| <b>2017</b>                           | 55.9                          | 56.8                          | 56.4                          |
| <b>P for trend</b>                    | <b>&lt;0.001</b>              | <b>&lt;0.001</b>              | <b>&lt;0.001</b>              |
| <b>Annual change in years, 95% CI</b> | <b>-0.38 (-0.52 to -0.24)</b> | <b>-0.37 (-0.49 to -0.25)</b> | <b>-0.38 (-0.47 to -0.29)</b> |

**Table S8. Sex differences in the prevalence and age of diagnosis of cardiovascular disease & its risk factors, stratified by income levels: Trends from 2008-2017 among high income earners.**

| Year                                  | Age of diagnosis           |                       |                      |
|---------------------------------------|----------------------------|-----------------------|----------------------|
|                                       | Men                        | Women                 | Total                |
| <b>High income</b>                    |                            |                       |                      |
| <b>CORONARY HEART DISEASE</b>         |                            |                       |                      |
| 2008                                  | 55.2                       | 57.5                  | 55.9                 |
| 2009                                  | 57.5                       | 60.8                  | 58.4                 |
| 2010                                  | 57.1                       | 58.5                  | 57.5                 |
| 2011                                  | 56.5                       | 60.2                  | 57.3                 |
| 2012                                  | 58.0                       | 62.3                  | 59.1                 |
| 2013                                  | 57.1                       | 60.2                  | 57.9                 |
| 2014                                  | 57.6                       | 61.1                  | 58.6                 |
| 2015                                  | 57.6                       | 57.3                  | 57.5                 |
| 2016                                  | 58.1                       | 58.2                  | 58.1                 |
| 2017                                  | 58.6                       | 58.2                  | 58.5                 |
| <b>P for trend</b>                    | <b>0.03</b>                | 0.74                  | 0.13                 |
| <b>Annual change in years, 95% CI</b> | <b>0.24 (0.02 to 0.46)</b> | -0.07 (-0.48 to 0.35) | 0.15 (-0.04 to 0.33) |
| <b>STROKE</b>                         |                            |                       |                      |
| 2008                                  | 58.4                       | 56.0                  | 57.2                 |
| 2009                                  | 60.9                       | 58.1                  | 59.3                 |
| 2010                                  | 60.3                       | 62.2                  | 61.2                 |
| 2011                                  | 58.4                       | 56.5                  | 57.5                 |
| 2012                                  | 58.5                       | 57.4                  | 57.9                 |
| 2013                                  | 60.5                       | 55.7                  | 58.2                 |
| 2014                                  | 58.9                       | 58.9                  | 58.9                 |
| 2015                                  | 58.8                       | 57.0                  | 57.9                 |
| 2016                                  | 60.2                       | 58.5                  | 59.4                 |
| 2017                                  | 60.9                       | 56.4                  | 58.9                 |
| <b>P for trend</b>                    | 0.66                       | 0.87                  | 0.83                 |
| <b>Annual change in years, 95% CI</b> | 0.11 (-0.39 to 0.61)       | -0.05 (-0.65 to 0.56) | 0.04 (-0.37 to 0.46) |
| <b>HYPERCHOLESTEROLEMIA</b>           |                            |                       |                      |
| 2008                                  | 48.5                       | 50.9                  | 49.6                 |
| 2009                                  | 48.4                       | 50.7                  | 49.5                 |
| 2010                                  | 48.3                       | 50.7                  | 49.3                 |
| 2011                                  | 48.2                       | 51.5                  | 49.6                 |
| 2012                                  | 48.1                       | 51.6                  | 49.6                 |
| 2013                                  | 48.7                       | 50.7                  | 49.6                 |
| 2014                                  | 48.2                       | 50.5                  | 49.2                 |
| 2015                                  | 47.6                       | 50.3                  | 48.7                 |
| 2016                                  | 47.5                       | 49.4                  | 48.3                 |

|                                       |                       |                               |                               |
|---------------------------------------|-----------------------|-------------------------------|-------------------------------|
| <b>2017</b>                           | 47.9                  | 49.6                          | 48.7                          |
| <b>P for trend</b>                    | 0.14                  | <b>0.006</b>                  | <b>0.009</b>                  |
| <b>Annual change in years, 95% CI</b> | -0.09 (-0.21 to 0.03) | <b>-0.16 (-0.28 to -0.05)</b> | <b>-0.13 (-0.22 to -0.03)</b> |
| <b>HYPERTENSION</b>                   |                       |                               |                               |
| <b>2008</b>                           | 46.6                  | 50.1                          | 48.2                          |
| <b>2009</b>                           | 46.7                  | 50.0                          | 48.2                          |
| <b>2010</b>                           | 47.0                  | 49.6                          | 48.2                          |
| <b>2011</b>                           | 47.5                  | 49.6                          | 48.4                          |
| <b>2012</b>                           | 47.4                  | 50.3                          | 48.6                          |
| <b>2013</b>                           | 48.0                  | 49.9                          | 48.7                          |
| <b>2014</b>                           | 47.2                  | 49.2                          | 48.0                          |
| <b>2015</b>                           | 47.0                  | 48.5                          | 47.7                          |
| <b>2016</b>                           | 46.4                  | 48.8                          | 47.4                          |
| <b>2017</b>                           | 46.3                  | 49.0                          | 47.5                          |
| <b>P for trend</b>                    | 0.55                  | <b>0.01</b>                   | 0.05                          |
| <b>Annual change in years, 95% CI</b> | -0.04 (-0.16 to 0.09) | <b>-0.16 (-0.29 to -0.03)</b> | -0.10 (-0.19 to 0.0003)       |

**Table S9. Sex differences in the prevalence and age of diagnosis of cardiovascular disease & its risk factors, stratified by income levels: Trends from 2008-2017 among middle income earners.**

| Year                                  | Age of diagnosis      |                               |                               |
|---------------------------------------|-----------------------|-------------------------------|-------------------------------|
|                                       | Men                   | Women                         | Total                         |
| <b>Middle income</b>                  |                       |                               |                               |
| <b>CORONARY HEART DISEASE</b>         |                       |                               |                               |
| 2008                                  | 58.4                  | 61.8                          | 59.8                          |
| 2009                                  | 58.5                  | 59.9                          | 59.0                          |
| 2010                                  | 56.8                  | 61.0                          | 58.7                          |
| 2011                                  | 58.8                  | 63.2                          | 60.5                          |
| 2012                                  | 59.1                  | 59.2                          | 59.2                          |
| 2013                                  | 58.0                  | 61.0                          | 59.2                          |
| 2014                                  | 57.5                  | 57.1                          | 57.3                          |
| 2015                                  | 57.6                  | 59.2                          | 58.2                          |
| 2016                                  | 57.1                  | 59.3                          | 57.9                          |
| 2017                                  | 58.0                  | 58.0                          | 58.0                          |
| <b>P for trend</b>                    | 0.44                  | <b>0.01</b>                   | <b>0.03</b>                   |
| <b>Annual change in years, 95% CI</b> | -0.09 (-0.34 to 0.15) | <b>-0.39 (-0.71 to -0.07)</b> | <b>-0.21 (-0.41 to -0.02)</b> |
| <b>STROKE</b>                         |                       |                               |                               |
| 2008                                  | 58.1                  | 58.2                          | 58.2                          |
| 2009                                  | 57.2                  | 59.0                          | 58.1                          |
| 2010                                  | 59.3                  | 61.1                          | 60.3                          |
| 2011                                  | 61.0                  | 59.9                          | 60.5                          |
| 2012                                  | 61.6                  | 60.5                          | 61.1                          |
| 2013                                  | 60.3                  | 61.1                          | 60.7                          |
| 2014                                  | 61.8                  | 56.1                          | 58.9                          |
| 2015                                  | 59.9                  | 55.9                          | 57.7                          |
| 2016                                  | 61.8                  | 55.1                          | 58.7                          |
| 2017                                  | 60.6                  | 58.2                          | 59.4                          |
| <b>P for trend</b>                    | 0.11                  | 0.13                          | 0.87                          |
| <b>Annual change in years, 95% CI</b> | 0.36 (-0.08 to 0.80)  | -0.41 (-0.95 to 0.12)         | -0.03 (-0.37 to 0.32)         |
| <b>HYPERCHOLESTEROLEMIA</b>           |                       |                               |                               |
| 2008                                  | 48.7                  | 51.8                          | 50.3                          |
| 2009                                  | 48.5                  | 52.1                          | 50.3                          |
| 2010                                  | 49.0                  | 51.7                          | 50.4                          |
| 2011                                  | 49.0                  | 51.9                          | 50.5                          |
| 2012                                  | 49.5                  | 51.6                          | 50.6                          |
| 2013                                  | 49.1                  | 51.7                          | 50.4                          |
| 2014                                  | 48.7                  | 51.2                          | 50.0                          |
| 2015                                  | 48.2                  | 50.7                          | 49.5                          |

|                                       |                       |                       |                       |
|---------------------------------------|-----------------------|-----------------------|-----------------------|
| <b>2016</b>                           | 48.8                  | 51.2                  | 50.0                  |
| <b>2017</b>                           | 49.5                  | 51.3                  | 50.4                  |
| <b>P for trend</b>                    | 0.73                  | 0.14                  | 0.39                  |
| <b>Annual change in years, 95% CI</b> | 0.02 (-0.10 to 0.15)  | -0.11 (-0.26 to 0.04) | -0.04 (-0.14 to 0.06) |
| <b>HYPERTENSION</b>                   |                       |                       |                       |
| <b>2008</b>                           | 47.0                  | 48.8                  | 47.9                  |
| <b>2009</b>                           | 46.7                  | 49.0                  | 47.9                  |
| <b>2010</b>                           | 46.3                  | 48.3                  | 47.3                  |
| <b>2011</b>                           | 47.7                  | 48.9                  | 48.3                  |
| <b>2012</b>                           | 46.8                  | 48.9                  | 47.9                  |
| <b>2013</b>                           | 45.6                  | 49.2                  | 47.4                  |
| <b>2014</b>                           | 46.4                  | 48.4                  | 47.4                  |
| <b>2015</b>                           | 46.6                  | 49.0                  | 47.8                  |
| <b>2016</b>                           | 45.9                  | 48.1                  | 47.0                  |
| <b>2017</b>                           | 46.3                  | 47.9                  | 47.1                  |
| <b>P for trend</b>                    | 0.24                  | 0.31                  | 0.14                  |
| <b>Annual change in years, 95% CI</b> | -0.09 (-0.24 to 0.06) | -0.08 (-0.23 to 0.08) | -0.09 (-0.21 to 0.03) |

**Table S10. Sex differences in the prevalence and age of diagnosis of cardiovascular disease & its risk factors, stratified by income levels: Trends from 2008-2017 among low income earners.**

| Year                           | Age of diagnosis     |                       |                      |
|--------------------------------|----------------------|-----------------------|----------------------|
|                                | Men                  | Women                 | Total                |
| <b>Low income</b>              |                      |                       |                      |
| <b>CORONARY HEART DISEASE</b>  |                      |                       |                      |
| 2008                           | 57.3                 | 60.9                  | 59.0                 |
| 2009                           | 57.9                 | 60.0                  | 58.8                 |
| 2010                           | 59.3                 | 60.7                  | 60.0                 |
| 2011                           | 60.1                 | 59.9                  | 60.0                 |
| 2012                           | 60.4                 | 63.5                  | 61.8                 |
| 2013                           | 58.9                 | 62.9                  | 60.8                 |
| 2014                           | 59.0                 | 65.3                  | 61.9                 |
| 2015                           | 57.6                 | 64.0                  | 60.4                 |
| 2016                           | 59.0                 | 62.7                  | 60.7                 |
| 2017                           | 59.5                 | 62.2                  | 60.8                 |
| P for trend                    | 0.65                 | 0.08                  | 0.14                 |
| Annual change in years, 95% CI | 0.09 (-0.29 to 0.47) | 0.36 (-0.06 to 0.78)  | 0.22 (-0.08 to 0.52) |
| <b>STROKE</b>                  |                      |                       |                      |
| 2008                           | 59.7                 | 61.8                  | 60.8                 |
| 2009                           | 58.7                 | 59.3                  | 59.0                 |
| 2010                           | 59.9                 | 59.9                  | 59.9                 |
| 2011                           | 60.9                 | 61.4                  | 61.2                 |
| 2012                           | 58.8                 | 60.4                  | 59.7                 |
| 2013                           | 59.4                 | 60.3                  | 59.9                 |
| 2014                           | 61.1                 | 66.1                  | 63.9                 |
| 2015                           | 59.9                 | 57.4                  | 58.5                 |
| 2016                           | 61.4                 | 60.5                  | 60.9                 |
| 2017                           | 60.0                 | 59.9                  | 60.0                 |
| P for trend                    | 0.67                 | 0.82                  | 0.89                 |
| Annual change in years, 95% CI | 0.15 (-0.53 to 0.82) | -0.07 (-0.64 to 0.50) | 0.03 (-0.39 to 0.45) |
| <b>HYPERCHOLESTEROLEMIA</b>    |                      |                       |                      |
| 2008                           | 52.8                 | 55.2                  | 54.2                 |
| 2009                           | 50.4                 | 53.9                  | 52.4                 |
| 2010                           | 50.0                 | 54.0                  | 52.3                 |
| 2011                           | 51.1                 | 53.4                  | 52.4                 |
| 2012                           | 52.0                 | 55.4                  | 53.8                 |
| 2013                           | 50.7                 | 54.5                  | 52.9                 |
| 2014                           | 50.1                 | 54.3                  | 52.6                 |
| 2015                           | 48.9                 | 54.3                  | 51.9                 |

|                                       |                               |                       |                               |
|---------------------------------------|-------------------------------|-----------------------|-------------------------------|
| <b>2016</b>                           | 51.0                          | 55.1                  | 53.3                          |
| <b>2017</b>                           | 50.6                          | 53.7                  | 52.4                          |
| <b>P for trend</b>                    | 0.18                          | 0.88                  | 0.33                          |
| <b>Annual change in years, 95% CI</b> | -0.16 (-0.38 to 0.07)         | -0.02 (-0.23 to 0.19) | -0.08 (-0.23 to 0.08)         |
| <b>HYPERTENSION</b>                   |                               |                       |                               |
| <b>2008</b>                           | 49.9                          | 50.6                  | 50.3                          |
| <b>2009</b>                           | 48.4                          | 50.7                  | 49.7                          |
| <b>2010</b>                           | 47.4                          | 50.0                  | 48.9                          |
| <b>2011</b>                           | 47.6                          | 50.6                  | 49.3                          |
| <b>2012</b>                           | 49.1                          | 50.7                  | 50.0                          |
| <b>2013</b>                           | 47.9                          | 49.9                  | 49.0                          |
| <b>2014</b>                           | 48.1                          | 49.0                  | 48.6                          |
| <b>2015</b>                           | 47.0                          | 49.0                  | 48.2                          |
| <b>2016</b>                           | 47.1                          | 50.7                  | 49.0                          |
| <b>2017</b>                           | 46.2                          | 49.7                  | 48.1                          |
| <b>P for trend</b>                    | <b>0.01</b>                   | 0.18                  | <b>0.009</b>                  |
| <b>Annual change in years, 95% CI</b> | <b>-0.27 (-0.49 to -0.06)</b> | -0.12 (-0.29 to 0.06) | <b>-0.19 (-0.33 to -0.05)</b> |

**Table S11. Sex differences in the prevalence and age of diagnosis of cardiovascular disease & its risk factors, stratified by income levels: Trends from 2008-2017 among very low income earners**

| Year                           | Age of diagnosis     |                               |                       |
|--------------------------------|----------------------|-------------------------------|-----------------------|
|                                | Men                  | Women                         | Total                 |
| <b>Very low income</b>         |                      |                               |                       |
| <b>CORONARY HEART DISEASE</b>  |                      |                               |                       |
| 2008                           | 53.5                 | 56.5                          | 55.2                  |
| 2009                           | 53.5                 | 53.8                          | 53.6                  |
| 2010                           | 56.0                 | 55.9                          | 56.0                  |
| 2011                           | 55.0                 | 56.8                          | 56.0                  |
| 2012                           | 55.9                 | 55.8                          | 55.8                  |
| 2013                           | 54.7                 | 54.4                          | 54.5                  |
| 2014                           | 55.5                 | 55.8                          | 55.7                  |
| 2015                           | 54.3                 | 57.6                          | 56.0                  |
| 2016                           | 54.1                 | 58.9                          | 56.3                  |
| 2017                           | 56.4                 | 58.9                          | 57.6                  |
| P for trend                    | 0.45                 | 0.05                          | 0.07                  |
| Annual change in years, 95% CI | 0.14 (-0.22 to 0.49) | 0.34 (-0.01 to 0.68)          | 0.23 (-0.02 to 0.47)  |
| <b>STROKE</b>                  |                      |                               |                       |
| 2008                           | 53.1                 | 56.9                          | 55.5                  |
| 2009                           | 55.6                 | 59.6                          | 58.0                  |
| 2010                           | 51.8                 | 55.9                          | 54.4                  |
| 2011                           | 53.9                 | 55.3                          | 54.7                  |
| 2012                           | 53.6                 | 53.3                          | 53.4                  |
| 2013                           | 55.0                 | 52.7                          | 53.6                  |
| 2014                           | 57.0                 | 53.3                          | 54.7                  |
| 2015                           | 53.9                 | 53.2                          | 53.5                  |
| 2016                           | 52.3                 | 50.9                          | 51.5                  |
| 2017                           | 55.7                 | 54.7                          | 55.2                  |
| P for trend                    | 0.50                 | <b>0.005</b>                  | 0.06                  |
| Annual change in years, 95% CI | 0.15 (-0.28 to 0.57) | <b>-0.60 (-1.02 to -0.19)</b> | -0.29 (-0.61 to 0.02) |
| <b>HYPERCHOLESTEROLEMIA</b>    |                      |                               |                       |
| 2008                           | 48.7                 | 54.3                          | 52.2                  |
| 2009                           | 48.6                 | 51.8                          | 50.5                  |
| 2010                           | 47.3                 | 50.7                          | 49.3                  |
| 2011                           | 48.5                 | 51.0                          | 50.0                  |
| 2012                           | 48.0                 | 50.9                          | 49.7                  |
| 2013                           | 49.1                 | 50.9                          | 50.2                  |
| 2014                           | 49.2                 | 51.2                          | 50.4                  |
| 2015                           | 48.4                 | 50.6                          | 49.7                  |



|                                       |                       |                       |                        |
|---------------------------------------|-----------------------|-----------------------|------------------------|
| <b>2016</b>                           | 49.2                  | 51.6                  | 50.7                   |
| <b>2017</b>                           | 49.1                  | 52.4                  | 51.1                   |
| <b>P for trend</b>                    | 0.25                  | 0.21                  | 0.70                   |
| <b>Annual change in years, 95% CI</b> | 0.11 (-0.08 to 0.30)  | -0.12 (-0.30 to 0.07) | -0.03 (-0.18 to 0.12)  |
| <b>HYPERTENSION</b>                   |                       |                       |                        |
| <b>2008</b>                           | 46.9                  | 47.8                  | 47.5                   |
| <b>2009</b>                           | 46.6                  | 46.2                  | 46.4                   |
| <b>2010</b>                           | 44.6                  | 46.8                  | 46.0                   |
| <b>2011</b>                           | 45.4                  | 47.4                  | 46.6                   |
| <b>2012</b>                           | 45.6                  | 46.8                  | 46.3                   |
| <b>2013</b>                           | 45.5                  | 46.4                  | 46.0                   |
| <b>2014</b>                           | 46.0                  | 46.8                  | 46.5                   |
| <b>2015</b>                           | 45.1                  | 46.8                  | 46.1                   |
| <b>2016</b>                           | 45.5                  | 47.3                  | 46.5                   |
| <b>2017</b>                           | 46.7                  | 47.5                  | 47.2                   |
| <b>P for trend</b>                    | 0.74                  | 0.81                  | 0.95                   |
| <b>Annual change in years, 95% CI</b> | -0.03 (-0.23 to 0.16) | 0.02 (-0.15 to 0.19)  | -0.004 (-0.14 to 0.13) |

**Table S12. Sex differences in the prevalence and age of diagnosis of cardiovascular disease & its risk factors, stratified by insurance status: Trends from 2008-2017 among participants with private insurance.**

| Year                           | Age of diagnosis     |                       |                       |
|--------------------------------|----------------------|-----------------------|-----------------------|
|                                | Men                  | Women                 | Total                 |
| <b>Private</b>                 |                      |                       |                       |
| <b>CORONARY HEART DISEASE</b>  |                      |                       |                       |
| 2008                           | 48.1                 | 48.8                  | 48.3                  |
| 2009                           | 48.4                 | 46.5                  | 47.9                  |
| 2010                           | 47.6                 | 46.2                  | 47.2                  |
| 2011                           | 47.6                 | 49.0                  | 48.0                  |
| 2012                           | 48.5                 | 48.8                  | 48.6                  |
| 2013                           | 47.2                 | 48.4                  | 47.6                  |
| 2014                           | 47.2                 | 46.6                  | 47.0                  |
| 2015                           | 47.8                 | 48.5                  | 48.1                  |
| 2016                           | 48.5                 | 46.6                  | 47.9                  |
| 2017                           | 48.9                 | 46.9                  | 48.2                  |
| P for trend                    | 0.81                 | 0.73                  | 0.94                  |
| Annual change in years, 95% CI | 0.03 (-0.19 to 0.25) | -0.07 (-0.51 to 0.36) | -0.01 (-0.22 to 0.21) |
| <b>STROKE</b>                  |                      |                       |                       |
| 2008                           | 49.3                 | 43.1                  | 45.8                  |
| 2009                           | 48.5                 | 46.0                  | 47.0                  |
| 2010                           | 46.4                 | 46.3                  | 46.4                  |
| 2011                           | 44.5                 | 43.8                  | 44.1                  |
| 2012                           | 46.8                 | 42.3                  | 44.2                  |
| 2013                           | 48.7                 | 42.5                  | 44.8                  |
| 2014                           | 49.8                 | 43.9                  | 46.4                  |
| 2015                           | 48.1                 | 43.7                  | 45.7                  |
| 2016                           | 47.6                 | 43.4                  | 45.3                  |
| 2017                           | 46.9                 | 42.4                  | 44.6                  |
| P for trend                    | 0.93                 | 0.42                  | 0.57                  |
| Annual change in years, 95% CI | 0.02 (-0.44 to 0.47) | -0.19 (-0.66 to 0.28) | -0.09 (-0.43 to 0.24) |
| <b>HYPERCHOLESTEROLEMIA</b>    |                      |                       |                       |
| 2008                           | 43.4                 | 45.1                  | 44.2                  |
| 2009                           | 43.2                 | 44.4                  | 43.7                  |
| 2010                           | 43.3                 | 44.4                  | 43.8                  |
| 2011                           | 43.1                 | 44.6                  | 43.8                  |
| 2012                           | 43.0                 | 44.9                  | 43.8                  |
| 2013                           | 43.3                 | 44.2                  | 43.7                  |
| 2014                           | 43.1                 | 44.0                  | 43.5                  |
| 2015                           | 42.1                 | 43.8                  | 42.8                  |

|                                       |                               |                               |                               |
|---------------------------------------|-------------------------------|-------------------------------|-------------------------------|
| <b>2016</b>                           | 42.4                          | 43.4                          | 42.8                          |
| <b>2017</b>                           | 42.6                          | 43.3                          | 42.9                          |
| <b>P for trend</b>                    | <b>0.01</b>                   | <b>0.001</b>                  | <b>&lt;0.001</b>              |
| <b>Annual change in years, 95% CI</b> | <b>-0.11 (-0.19 to -0.02)</b> | <b>-0.17 (-0.27 to -0.07)</b> | <b>-0.14 (-0.21 to -0.07)</b> |
| <b>HYPERTENSION</b>                   |                               |                               |                               |
| <b>2008</b>                           | 41.6                          | 43.5                          | 42.5                          |
| <b>2009</b>                           | 41.6                          | 42.5                          | 42.0                          |
| <b>2010</b>                           | 41.6                          | 42.3                          | 41.9                          |
| <b>2011</b>                           | 41.9                          | 43.2                          | 42.5                          |
| <b>2012</b>                           | 41.7                          | 42.5                          | 42.1                          |
| <b>2013</b>                           | 41.7                          | 42.5                          | 42.0                          |
| <b>2014</b>                           | 41.7                          | 42.0                          | 41.8                          |
| <b>2015</b>                           | 41.1                          | 41.9                          | 41.5                          |
| <b>2016</b>                           | 41.2                          | 42.3                          | 41.7                          |
| <b>2017</b>                           | 40.8                          | 42.1                          | 41.4                          |
| <b>P for trend</b>                    | 0.10                          | <b>0.01</b>                   | <b>0.009</b>                  |
| <b>Annual change in years, 95% CI</b> | -0.08 (-0.17 to 0.02)         | <b>-0.12 (-0.22 to -0.02)</b> | <b>-0.10 (-0.17 to -0.02)</b> |

**Table S13. Sex differences in the prevalence and age of diagnosis of cardiovascular disease & its risk factors, stratified by insurance status: Trends from 2008-2017 among uninsured participants.**

| Year                           | Age of diagnosis     |                            |                            |
|--------------------------------|----------------------|----------------------------|----------------------------|
|                                | Men                  | Women                      | Total                      |
| <b>Uninsured</b>               |                      |                            |                            |
| <b>CORONARY HEART DISEASE</b>  |                      |                            |                            |
| 2008                           | 44.5                 | 46.9                       | 45.4                       |
| 2009                           | 45.7                 | 47.8                       | 46.7                       |
| 2010                           | 46.9                 | 45.8                       | 46.5                       |
| 2011                           | 45.3                 | 47.6                       | 46.2                       |
| 2012                           | 47.4                 | 44.9                       | 46.4                       |
| 2013                           | 48.7                 | 47.3                       | 48.0                       |
| 2014                           | 46.2                 | 45.7                       | 46.0                       |
| 2015                           | 47.5                 | 43.5                       | 46.6                       |
| 2016                           | 49.7                 | 49.3                       | 49.5                       |
| 2017                           | 45.8                 | 50.3                       | 48.3                       |
| P for trend                    | 0.21                 | 0.83                       | 0.34                       |
| Annual change in years, 95% CI | 0.34 (-0.19 to 0.88) | 0.09 (-0.75 to 0.93)       | 0.24 (-0.26 to 0.73)       |
| <b>STROKE</b>                  |                      |                            |                            |
| 2008                           | 41.1                 | 39.7                       | 40.5                       |
| 2009                           | 39.6                 | 41.4                       | 40.6                       |
| 2010                           | 41.2                 | 40.7                       | 41.0                       |
| 2011                           | 41.5                 | 42.7                       | 42.2                       |
| 2012                           | 45.8                 | 37.9                       | 42.2                       |
| 2013                           | 48.4                 | 38.8                       | 45.1                       |
| 2014                           | 46.8                 | 41.5                       | 44.0                       |
| 2015                           | 50.0                 | 47.0                       | 48.4                       |
| 2016                           | 42.4                 | 48.5                       | 45.4                       |
| 2017                           | 43.0                 | 44.6                       | 43.7                       |
| P for trend                    | 0.08                 | <b>0.02</b>                | <b>0.007</b>               |
| Annual change in years, 95% CI | 0.63 (-0.09 to 1.34) | <b>0.69 (0.08 to 1.30)</b> | <b>0.65 (0.18 to 1.12)</b> |
| <b>HYPERCHOLESTEROLEMIA</b>    |                      |                            |                            |
| 2008                           | 41.6                 | 44.5                       | 42.9                       |
| 2009                           | 41.6                 | 44.7                       | 43.1                       |
| 2010                           | 43.1                 | 43.4                       | 43.2                       |
| 2011                           | 41.8                 | 43.7                       | 42.6                       |
| 2012                           | 41.7                 | 44.3                       | 43.0                       |
| 2013                           | 40.7                 | 43.8                       | 42.2                       |
| 2014                           | 41.9                 | 42.3                       | 42.1                       |
| 2015                           | 40.5                 | 41.2                       | 40.8                       |

|                                       |                       |                                |                        |
|---------------------------------------|-----------------------|--------------------------------|------------------------|
| <b>2016</b>                           | 41.9                  | 42.5                           | 42.2                   |
| <b>2017</b>                           | 41.9                  | 44.2                           | 42.9                   |
| <b>P for trend</b>                    | 0.52                  | <b>0.04</b>                    | 0.08                   |
| <b>Annual change in years, 95% CI</b> | -0.07 (-0.28 to 0.15) | <b>-0.24 (-0.49 to -0.001)</b> | -0.15 (-0.31 to 0.02)  |
| <b>HYPERTENSION</b>                   |                       |                                |                        |
| <b>2008</b>                           | 40.2                  | 41.0                           | 40.5                   |
| <b>2009</b>                           | 40.0                  | 41.0                           | 40.5                   |
| <b>2010</b>                           | 40.5                  | 41.1                           | 40.7                   |
| <b>2011</b>                           | 39.9                  | 40.2                           | 40.1                   |
| <b>2012</b>                           | 39.7                  | 41.6                           | 40.6                   |
| <b>2013</b>                           | 40.1                  | 41.5                           | 40.7                   |
| <b>2014</b>                           | 41.2                  | 40.3                           | 40.9                   |
| <b>2015</b>                           | 40.2                  | 40.9                           | 40.6                   |
| <b>2016</b>                           | 38.6                  | 40.8                           | 39.6                   |
| <b>2017</b>                           | 41.1                  | 41.2                           | 41.1                   |
| <b>P for trend</b>                    | 0.96                  | 0.98                           | 0.97                   |
| <b>Annual change in years, 95% CI</b> | 0.005 (-0.21 to 0.22) | -0.002 (-0.19 to 0.19)         | -0.002 (-0.16 to 0.15) |

**Table S14. Sex differences in the prevalence and age of diagnosis of cardiovascular disease & its risk factors, stratified by insurance status: Trends from 2008-2017 among participants with Medicaid insurance.**

| Year                                  | Age of diagnosis     |                       |                       |
|---------------------------------------|----------------------|-----------------------|-----------------------|
|                                       | Men                  | Women                 | Total                 |
| <b>Medicaid</b>                       |                      |                       |                       |
| <b>CORONARY HEART DISEASE</b>         |                      |                       |                       |
| 2008                                  | 46.4                 | 48.1                  | 47.4                  |
| 2009                                  | 44.3                 | 45.5                  | 45.0                  |
| 2010                                  | 45.0                 | 44.9                  | 44.9                  |
| 2011                                  | 47.8                 | 47.3                  | 47.6                  |
| 2012                                  | 49.0                 | 44.5                  | 47.1                  |
| 2013                                  | 47.8                 | 43.3                  | 45.6                  |
| 2014                                  | 46.8                 | 48.2                  | 47.5                  |
| 2015                                  | 46.5                 | 48.0                  | 47.0                  |
| 2016                                  | 45.5                 | 47.3                  | 46.3                  |
| 2017                                  | 49.1                 | 46.7                  | 48.3                  |
| <b>P for trend</b>                    | 0.62                 | 0.50                  | 0.33                  |
| <b>Annual change in years, 95% CI</b> | 0.11 (-0.31 to 0.52) | 0.11 (-0.22 to 0.44)  | 0.13 (-0.13 to 0.38)  |
| <b>STROKE</b>                         |                      |                       |                       |
| 2008                                  | 46.5                 | 40.8                  | 42.8                  |
| 2009                                  | 48.6                 | 44.5                  | 46.2                  |
| 2010                                  | 41.3                 | 47.0                  | 45.0                  |
| 2011                                  | 46.3                 | 45.7                  | 46.0                  |
| 2012                                  | 47.6                 | 43.9                  | 45.9                  |
| 2013                                  | 46.2                 | 40.3                  | 43.3                  |
| 2014                                  | 47.8                 | 41.6                  | 44.0                  |
| 2015                                  | 47.0                 | 42.0                  | 44.1                  |
| 2016                                  | 46.1                 | 41.9                  | 43.5                  |
| 2017                                  | 46.8                 | 42.7                  | 44.5                  |
| <b>P for trend</b>                    | 0.87                 | 0.25                  | 0.40                  |
| <b>Annual change in years, 95% CI</b> | 0.04 (-0.46 to 0.55) | -0.26 (-0.72 to 0.19) | -0.14 (-0.48 to 0.19) |
| <b>HYPERCHOLESTEROLEMIA</b>           |                      |                       |                       |
| 2008                                  | 44.3                 | 43.2                  | 43.6                  |
| 2009                                  | 41.5                 | 42.1                  | 41.9                  |
| 2010                                  | 39.4                 | 41.7                  | 41.0                  |
| 2011                                  | 44.1                 | 43.8                  | 44.0                  |
| 2012                                  | 44.4                 | 42.8                  | 43.5                  |
| 2013                                  | 44.0                 | 43.5                  | 43.7                  |
| 2014                                  | 43.5                 | 44.4                  | 44.0                  |
| 2015                                  | 43.8                 | 43.4                  | 43.6                  |
| 2016                                  | 42.7                 | 42.8                  | 42.8                  |

|                                       |                       |                            |                      |
|---------------------------------------|-----------------------|----------------------------|----------------------|
| <b>2017</b>                           | 43.4                  | 43.0                       | 43.2                 |
| <b>P for trend</b>                    | 0.64                  | 0.46                       | 0.36                 |
| <b>Annual change in years, 95% CI</b> | 0.04 (-0.14 to 0.23)  | 0.06 (-0.11 to 0.24)       | 0.06 (-0.07 to 0.18) |
| <b>HYPERTENSION</b>                   |                       |                            |                      |
| <b>2008</b>                           | 42.4                  | 37.7                       | 39.3                 |
| <b>2009</b>                           | 40.5                  | 39.1                       | 39.5                 |
| <b>2010</b>                           | 38.2                  | 38.2                       | 38.2                 |
| <b>2011</b>                           | 41.6                  | 40.7                       | 41.1                 |
| <b>2012</b>                           | 41.9                  | 39.6                       | 40.7                 |
| <b>2013</b>                           | 40.6                  | 40.0                       | 40.3                 |
| <b>2014</b>                           | 40.5                  | 40.6                       | 40.5                 |
| <b>2015</b>                           | 40.9                  | 39.8                       | 40.3                 |
| <b>2016</b>                           | 40.5                  | 40.3                       | 40.4                 |
| <b>2017</b>                           | 40.5                  | 39.9                       | 40.2                 |
| <b>P for trend</b>                    | 0.38                  | <b>0.04</b>                | 0.24                 |
| <b>Annual change in years, 95% CI</b> | -0.10 (-0.31 to 0.12) | <b>0.18 (0.01 to 0.35)</b> | 0.08 (-0.06 to 0.22) |

**Table S15. Sex differences in the prevalence and age of diagnosis of cardiovascular disease & its risk factors, stratified by insurance status: Trends from 2008-2017 among participants with Medicare insurance.**

| Year                           | Age of diagnosis           |                      |                            |
|--------------------------------|----------------------------|----------------------|----------------------------|
|                                | Men                        | Women                | Total                      |
| <b>Medicare</b>                |                            |                      |                            |
| <b>CORONARY HEART DISEASE</b>  |                            |                      |                            |
| 2008                           | 60.3                       | 63.2                 | 61.8                       |
| 2009                           | 61.4                       | 63.0                 | 62.2                       |
| 2010                           | 61.8                       | 62.8                 | 62.3                       |
| 2011                           | 64.0                       | 66.0                 | 64.8                       |
| 2012                           | 64.2                       | 66.0                 | 64.9                       |
| 2013                           | 62.2                       | 66.6                 | 63.9                       |
| 2014                           | 62.5                       | 65.4                 | 63.6                       |
| 2015                           | 62.2                       | 63.9                 | 62.9                       |
| 2016                           | 61.9                       | 64.5                 | 62.9                       |
| 2017                           | 62.3                       | 64.3                 | 63.0                       |
| P for trend                    | 0.94                       | 0.41                 | 0.79                       |
| Annual change in years, 95% CI | 0.008 (-0.22 to 0.23)      | 0.10 (-0.14 to 0.34) | 0.02 (-0.15 to 0.19)       |
| <b>STROKE</b>                  |                            |                      |                            |
| 2008                           | 60.2                       | 64.7                 | 62.6                       |
| 2009                           | 61.2                       | 66.0                 | 63.8                       |
| 2010                           | 64.5                       | 64.7                 | 64.6                       |
| 2011                           | 68.6                       | 67.5                 | 68.0                       |
| 2012                           | 66.4                       | 67.8                 | 67.2                       |
| 2013                           | 66.1                       | 67.5                 | 66.9                       |
| 2014                           | 66.5                       | 69.2                 | 67.9                       |
| 2015                           | 66.0                       | 66.3                 | 66.2                       |
| 2016                           | 66.6                       | 65.9                 | 66.2                       |
| 2017                           | 66.8                       | 66.2                 | 66.5                       |
| P for trend                    | <b>0.01</b>                | 0.58                 | <b>0.03</b>                |
| Annual change in years, 95% CI | <b>0.48 (0.12 to 0.84)</b> | 0.09 (-0.24 to 0.43) | <b>0.27 (0.02 to 0.53)</b> |
| <b>HYPERCHOLESTEROLEMIA</b>    |                            |                      |                            |
| 2008                           | 60.4                       | 62.8                 | 61.8                       |
| 2009                           | 59.9                       | 61.9                 | 61.1                       |
| 2010                           | 58.5                       | 61.3                 | 60.2                       |
| 2011                           | 61.5                       | 63.1                 | 62.4                       |
| 2012                           | 60.9                       | 63.0                 | 62.0                       |
| 2013                           | 60.2                       | 62.2                 | 61.3                       |
| 2014                           | 59.3                       | 61.4                 | 60.5                       |
| 2015                           | 58.5                       | 61.0                 | 59.9                       |



|                                       |                               |                               |                               |
|---------------------------------------|-------------------------------|-------------------------------|-------------------------------|
| <b>2016</b>                           | 58.8                          | 61.1                          | 60.0                          |
| <b>2017</b>                           | 58.2                          | 60.1                          | 59.2                          |
| <b>P for trend</b>                    | <b>&lt;0.001</b>              | <b>&lt;0.001</b>              | <b>&lt;0.001</b>              |
| <b>Annual change in years, 95% CI</b> | <b>-0.29 (-0.43 to -0.14)</b> | <b>-0.27 (-0.41 to -0.14)</b> | <b>-0.29 (-0.39 to -0.18)</b> |
| <b>HYPERTENSION</b>                   |                               |                               |                               |
| <b>2008</b>                           | 57.5                          | 58.3                          | 58.0                          |
| <b>2009</b>                           | 57.1                          | 57.3                          | 57.2                          |
| <b>2010</b>                           | 55.8                          | 56.3                          | 56.1                          |
| <b>2011</b>                           | 58.7                          | 58.8                          | 58.8                          |
| <b>2012</b>                           | 58.0                          | 58.9                          | 58.5                          |
| <b>2013</b>                           | 57.2                          | 58.2                          | 57.7                          |
| <b>2014</b>                           | 56.8                          | 57.4                          | 57.1                          |
| <b>2015</b>                           | 56.8                          | 57.8                          | 57.4                          |
| <b>2016</b>                           | 55.9                          | 56.9                          | 56.5                          |
| <b>2017</b>                           | 55.9                          | 56.8                          | 56.4                          |
| <b>P for trend</b>                    | <b>0.008</b>                  | 0.06                          | <b>0.003</b>                  |
| <b>Annual change in years, 95% CI</b> | <b>-0.21 (-0.37 to -0.06)</b> | -0.13 (-0.26 to 0.08)         | <b>-0.17 (-0.28 to -0.06)</b> |

**Table S16. Sex differences in the prevalence and age of diagnosis of cardiovascular disease & its risk factors, stratified by region: Trends from 2008-2017 among participants living in the Northeast.**

| Year                           | Age of diagnosis        |                      |                            |
|--------------------------------|-------------------------|----------------------|----------------------------|
|                                | Men                     | Women                | Total                      |
| <b>Northeast</b>               |                         |                      |                            |
| <b>CORONARY HEART DISEASE</b>  |                         |                      |                            |
| 2008                           | 58.5                    | 56.5                 | 57.6                       |
| 2009                           | 60.4                    | 56.2                 | 58.8                       |
| 2010                           | 58.6                    | 59.2                 | 58.8                       |
| 2011                           | 58.7                    | 60.6                 | 59.4                       |
| 2012                           | 58.5                    | 61.0                 | 59.5                       |
| 2013                           | 57.1                    | 59.1                 | 57.9                       |
| 2014                           | 58.9                    | 58.9                 | 58.9                       |
| 2015                           | 59.4                    | 59.5                 | 59.5                       |
| 2016                           | 59.2                    | 62.2                 | 60.5                       |
| 2017                           | 57.5                    | 60.1                 | 58.5                       |
| P for trend                    | 0.69                    | 0.05                 | 0.41                       |
| Annual change in years, 95% CI | -0.08 (-0.49 to 0.33)   | 0.44 (-0.01 to 0.88) | 0.13 (-0.17 to 0.43)       |
| <b>STROKE</b>                  |                         |                      |                            |
| 2008                           | 53.7                    | 55.3                 | 54.6                       |
| 2009                           | 54.0                    | 58.1                 | 56.3                       |
| 2010                           | 58.7                    | 63.0                 | 61.2                       |
| 2011                           | 61.8                    | 58.9                 | 60.4                       |
| 2012                           | 57.8                    | 57.7                 | 57.7                       |
| 2013                           | 56.8                    | 55.1                 | 56.0                       |
| 2014                           | 62.1                    | 59.9                 | 61.1                       |
| 2015                           | 61.8                    | 58.9                 | 60.1                       |
| 2016                           | 63.3                    | 59.7                 | 61.4                       |
| 2017                           | 61.2                    | 61.3                 | 61.3                       |
| P for trend                    | <b>0.005</b>            | 0.47                 | <b>0.01</b>                |
| Annual change in years, 95% CI | <b>0.86 (0.27-1.46)</b> | 0.24 (-0.43 to 0.92) | <b>0.54 (0.12 to 0.95)</b> |
| <b>HYPERCHOLESTEROLEMIA</b>    |                         |                      |                            |
| 2008                           | 49.0                    | 52.9                 | 51.0                       |
| 2009                           | 48.8                    | 52.6                 | 50.6                       |
| 2010                           | 49.6                    | 52.2                 | 50.8                       |
| 2011                           | 47.8                    | 52.8                 | 50.2                       |
| 2012                           | 47.4                    | 52.5                 | 49.9                       |
| 2013                           | 48.1                    | 51.7                 | 50.0                       |
| 2014                           | 48.1                    | 51.4                 | 49.7                       |
| 2015                           | 48.6                    | 52.0                 | 50.2                       |

|                                       |                        |                       |                        |
|---------------------------------------|------------------------|-----------------------|------------------------|
| <b>2016</b>                           | 48.8                   | 52.8                  | 50.8                   |
| <b>2017</b>                           | 48.9                   | 50.5                  | 49.7                   |
| <b>P for trend</b>                    | 0.84                   | 0.09                  | 0.29                   |
| <b>Annual change in years, 95% CI</b> | -0.02 (-0.25 to 0.20)  | -0.16 (-0.34 to 0.03) | -0.08 (-0.24 to 0.07)  |
| <b>HYPERTENSION</b>                   |                        |                       |                        |
| <b>2008</b>                           | 47.3                   | 49.9                  | 48.6                   |
| <b>2009</b>                           | 47.2                   | 49.8                  | 48.5                   |
| <b>2010</b>                           | 47.4                   | 48.9                  | 48.1                   |
| <b>2011</b>                           | 47.7                   | 50.4                  | 49.0                   |
| <b>2012</b>                           | 47.2                   | 50.2                  | 48.7                   |
| <b>2013</b>                           | 47.8                   | 49.8                  | 48.8                   |
| <b>2014</b>                           | 48.6                   | 50.0                  | 49.3                   |
| <b>2015</b>                           | 47.2                   | 49.3                  | 48.3                   |
| <b>2016</b>                           | 47.2                   | 50.7                  | 48.9                   |
| <b>2017</b>                           | 46.2                   | 50.0                  | 48.0                   |
| <b>P for trend</b>                    | 0.63                   | 0.69                  | 0.92                   |
| <b>Annual change in years, 95% CI</b> | -0.053 (-0.27 to 0.17) | 0.05 (-0.17 to 0.26)  | -0.008 (-0.18 to 0.16) |

**Table S17. Sex differences in the prevalence and age of diagnosis of cardiovascular disease & its risk factors, stratified by region: Trends from 2008-2017 among individuals living in the Midwest.**

| Year                           | Age of diagnosis      |                       |                       |
|--------------------------------|-----------------------|-----------------------|-----------------------|
|                                | Men                   | Women                 | Total                 |
| <b>Midwest</b>                 |                       |                       |                       |
| <b>CORONARY HEART DISEASE</b>  |                       |                       |                       |
| 2008                           | 55.6                  | 62.0                  | 58.5                  |
| 2009                           | 56.1                  | 61.2                  | 58.0                  |
| 2010                           | 57.5                  | 62.6                  | 59.6                  |
| 2011                           | 57.2                  | 62.4                  | 59.1                  |
| 2012                           | 58.0                  | 62.1                  | 59.2                  |
| 2013                           | 56.8                  | 63.4                  | 59.0                  |
| 2014                           | 56.8                  | 60.4                  | 58.3                  |
| 2015                           | 58.6                  | 58.3                  | 58.5                  |
| 2016                           | 56.5                  | 59.2                  | 57.5                  |
| 2017                           | 57.4                  | 58.6                  | 57.8                  |
| P for trend                    | 0.37                  | 0.05                  | 0.41                  |
| Annual change in years, 95% CI | 0.12 (-0.15 to 0.39)  | -0.41 (-0.82 to 0.01) | -0.11 (-0.36 to 0.15) |
| <b>STROKE</b>                  |                       |                       |                       |
| 2008                           | 60.3                  | 58.1                  | 59.2                  |
| 2009                           | 62.2                  | 58.7                  | 60.2                  |
| 2010                           | 58.9                  | 57.0                  | 57.7                  |
| 2011                           | 58.1                  | 59.1                  | 58.6                  |
| 2012                           | 60.3                  | 57.0                  | 58.7                  |
| 2013                           | 60.5                  | 57.1                  | 58.7                  |
| 2014                           | 60.6                  | 60.6                  | 60.6                  |
| 2015                           | 57.8                  | 56.0                  | 56.9                  |
| 2016                           | 58.3                  | 57.2                  | 57.7                  |
| 2017                           | 60.9                  | 57.1                  | 58.8                  |
| P for trend                    | 0.57                  | 0.71                  | 0.57                  |
| Annual change in years, 95% CI | -0.14 (-0.62 to 0.34) | -0.11 (-0.72 to 0.49) | -0.12 (-0.53 to 0.29) |
| <b>HYPERCHOLESTEROLEMIA</b>    |                       |                       |                       |
| 2008                           | 49.5                  | 52.2                  | 50.9                  |
| 2009                           | 49.5                  | 51.8                  | 50.7                  |
| 2010                           | 48.6                  | 51.3                  | 50.0                  |
| 2011                           | 49.0                  | 51.7                  | 50.3                  |
| 2012                           | 48.9                  | 51.8                  | 50.3                  |
| 2013                           | 49.0                  | 51.3                  | 50.1                  |
| 2014                           | 49.5                  | 51.1                  | 50.2                  |
| 2015                           | 48.9                  | 50.7                  | 49.8                  |

|                                       |                        |                       |                       |
|---------------------------------------|------------------------|-----------------------|-----------------------|
| <b>2016</b>                           | 48.7                   | 50.8                  | 49.7                  |
| <b>2017</b>                           | 48.7                   | 51.1                  | 49.9                  |
| <b>P for trend</b>                    | 0.50                   | 0.12                  | 0.12                  |
| <b>Annual change in years, 95% CI</b> | - 0.06 (-0.24 to 0.12) | -0.14 (-0.31 to 0.04) | -0.10 (-0.24 to 0.03) |
| <b>HYPERTENSION</b>                   |                        |                       |                       |
| <b>2008</b>                           | 47.6                   | 49.0                  | 48.3                  |
| <b>2009</b>                           | 46.7                   | 48.5                  | 47.6                  |
| <b>2010</b>                           | 45.5                   | 48.4                  | 47.0                  |
| <b>2011</b>                           | 47.0                   | 49.7                  | 48.4                  |
| <b>2012</b>                           | 47.2                   | 50.1                  | 48.7                  |
| <b>2013</b>                           | 46.4                   | 48.7                  | 47.6                  |
| <b>2014</b>                           | 46.5                   | 48.2                  | 47.3                  |
| <b>2015</b>                           | 47.1                   | 47.8                  | 47.5                  |
| <b>2016</b>                           | 46.0                   | 48.2                  | 47.1                  |
| <b>2017</b>                           | 46.8                   | 48.3                  | 47.6                  |
| <b>P for trend</b>                    | 0.72                   | 0.22                  | 0.27                  |
| <b>Annual change in years, 95% CI</b> | -0.03 (-0.22 to 0.15)  | -0.11 (-0.29 to 0.07) | -0.08 (-0.22 to 0.06) |

**Table S18. Sex differences in the prevalence and age of diagnosis of cardiovascular disease & its risk factors, stratified by region: Trends from 2008-2017 among individuals living in the South.**

| Year                                  | Age of diagnosis     |                               |                       |
|---------------------------------------|----------------------|-------------------------------|-----------------------|
|                                       | Men                  | Women                         | Total                 |
| <b>South</b>                          |                      |                               |                       |
| <b>CORONARY HEART DISEASE</b>         |                      |                               |                       |
| 2008                                  | 55.0                 | 57.8                          | 56.2                  |
| 2009                                  | 55.8                 | 57.9                          | 56.7                  |
| 2010                                  | 56.6                 | 56.8                          | 56.7                  |
| 2011                                  | 57.8                 | 57.1                          | 57.6                  |
| 2012                                  | 58.5                 | 57.5                          | 58.1                  |
| 2013                                  | 57.7                 | 57.5                          | 57.6                  |
| 2014                                  | 56.5                 | 57.4                          | 56.9                  |
| 2015                                  | 56.1                 | 58.4                          | 57.1                  |
| 2016                                  | 57.5                 | 57.8                          | 57.6                  |
| 2017                                  | 58.4                 | 59.1                          | 58.7                  |
| <b>P for trend</b>                    | 0.12                 | 0.51                          | 0.12                  |
| <b>Annual change in years, 95% CI</b> | 0.21 (-0.05 to 0.47) | 0.11 (-0.22 to 0.43)          | 0.16 (-0.04 to 0.37)  |
| <b>STROKE</b>                         |                      |                               |                       |
| 2008                                  | 56.8                 | 57.6                          | 57.3                  |
| 2009                                  | 57.9                 | 58.6                          | 58.3                  |
| 2010                                  | 57.6                 | 59.5                          | 58.6                  |
| 2011                                  | 57.0                 | 56.0                          | 56.5                  |
| 2012                                  | 56.5                 | 56.1                          | 56.3                  |
| 2013                                  | 58.5                 | 56.1                          | 57.1                  |
| 2014                                  | 58.9                 | 54.9                          | 56.6                  |
| 2015                                  | 57.2                 | 54.3                          | 55.6                  |
| 2016                                  | 57.9                 | 54.2                          | 55.9                  |
| 2017                                  | 58.0                 | 57.0                          | 57.5                  |
| <b>P for trend</b>                    | 0.68                 | <b>0.04</b>                   | 0.28                  |
| <b>Annual change in years, 95% CI</b> | 0.09 (-0.38 to 0.57) | <b>-0.39 (-0.79 to -0.01)</b> | -0.17 (-0.48 to 0.14) |
| <b>HYPERCHOLESTEROLEMIA</b>           |                      |                               |                       |
| 2008                                  | 49.1                 | 52.5                          | 50.9                  |
| 2009                                  | 48.5                 | 51.4                          | 50.0                  |
| 2010                                  | 48.5                 | 51.2                          | 49.9                  |
| 2011                                  | 49.5                 | 51.5                          | 50.5                  |
| 2012                                  | 49.6                 | 51.7                          | 50.7                  |
| 2013                                  | 49.5                 | 51.7                          | 50.6                  |
| 2014                                  | 49.1                 | 51.4                          | 50.2                  |
| 2015                                  | 48.0                 | 50.4                          | 49.2                  |
| 2016                                  | 48.6                 | 50.5                          | 49.5                  |

|                                       |                       |                               |                               |
|---------------------------------------|-----------------------|-------------------------------|-------------------------------|
| <b>2017</b>                           | 49.0                  | 51.4                          | 50.2                          |
| <b>P for trend</b>                    | 0.68                  | 0.08                          | 0.13                          |
| <b>Annual change in years, 95% CI</b> | -0.03 (-0.18 to 0.12) | -0.13 (-0.28 to 0.02)         | -0.09 (-0.21 to 0.03)         |
| <b>HYPERTENSION</b>                   |                       |                               |                               |
| <b>2008</b>                           | 46.6                  | 48.5                          | 47.6                          |
| <b>2009</b>                           | 46.6                  | 48.2                          | 47.5                          |
| <b>2010</b>                           | 46.4                  | 48.4                          | 47.4                          |
| <b>2011</b>                           | 46.7                  | 47.6                          | 47.2                          |
| <b>2012</b>                           | 46.4                  | 47.6                          | 47.0                          |
| <b>2013</b>                           | 46.5                  | 47.9                          | 47.2                          |
| <b>2014</b>                           | 46.5                  | 47.2                          | 46.9                          |
| <b>2015</b>                           | 46.3                  | 47.7                          | 47.0                          |
| <b>2016</b>                           | 45.4                  | 47.4                          | 46.4                          |
| <b>2017</b>                           | 46.0                  | 47.1                          | 46.6                          |
| <b>P for trend</b>                    | 0.21                  | <b>0.03</b>                   | <b>0.03</b>                   |
| <b>Annual change in years, 95% CI</b> | -0.08 (-0.23 to 0.05) | <b>-0.14 (-0.27 to -0.01)</b> | <b>-0.12 (-0.22 to -0.01)</b> |

**Table S19. Sex differences in the prevalence and age of diagnosis of cardiovascular disease & its risk factors, stratified by region: Trends from 2008-2017 among individuals living in the West.**

| Year                           | Age of diagnosis     |                               |                       |
|--------------------------------|----------------------|-------------------------------|-----------------------|
|                                | Men                  | Women                         | Total                 |
| <b>West</b>                    |                      |                               |                       |
| <b>CORONARY HEART DISEASE</b>  |                      |                               |                       |
| 2008                           | 57.3                 | 60.8                          | 58.5                  |
| 2009                           | 58.0                 | 58.3                          | 58.1                  |
| 2010                           | 56.6                 | 59.1                          | 57.6                  |
| 2011                           | 55.4                 | 63.3                          | 58.7                  |
| 2012                           | 58.5                 | 62.2                          | 60.0                  |
| 2013                           | 57.2                 | 59.4                          | 58.2                  |
| 2014                           | 58.0                 | 61.7                          | 59.3                  |
| 2015                           | 55.2                 | 62.8                          | 57.8                  |
| 2016                           | 56.2                 | 60.8                          | 58.0                  |
| 2017                           | 59.5                 | 59.5                          | 59.5                  |
| P for trend                    | 0.92                 | 0.69                          | 0.44                  |
| Annual change in years, 95% CI | 0.02 (-0.29 to 0.33) | 0.11 (-0.42 to 0.63)          | 0.05 (-0.18 to 0.28)  |
| <b>STROKE</b>                  |                      |                               |                       |
| 2008                           | 58.1                 | 60.8                          | 59.6                  |
| 2009                           | 57.5                 | 60.7                          | 59.3                  |
| 2010                           | 58.1                 | 60.2                          | 59.1                  |
| 2011                           | 60.2                 | 60.1                          | 60.1                  |
| 2012                           | 59.6                 | 60.6                          | 60.2                  |
| 2013                           | 60.0                 | 61.3                          | 60.7                  |
| 2014                           | 57.7                 | 58.7                          | 58.3                  |
| 2015                           | 58.4                 | 56.5                          | 57.4                  |
| 2016                           | 60.5                 | 55.8                          | 58.0                  |
| 2017                           | 59.1                 | 54.4                          | 56.8                  |
| P for trend                    | 0.70                 | <b>0.04</b>                   | 0.27                  |
| Annual change in years, 95% CI | 0.14 (-0.59 to 0.89) | <b>-0.69 (-1.39 to -0.01)</b> | -0.30 (-0.85 to 0.24) |
| <b>HYPERCHOLESTEROLEMIA</b>    |                      |                               |                       |
| 2008                           | 48.6                 | 51.8                          | 50.1                  |
| 2009                           | 48.1                 | 51.8                          | 49.8                  |
| 2010                           | 47.8                 | 51.5                          | 49.5                  |
| 2011                           | 48.3                 | 51.6                          | 49.9                  |
| 2012                           | 49.2                 | 52.4                          | 50.8                  |
| 2013                           | 49.2                 | 51.7                          | 50.4                  |
| 2014                           | 47.6                 | 51.9                          | 49.6                  |
| 2015                           | 46.6                 | 51.8                          | 49.1                  |



|                                       |                       |                       |                       |
|---------------------------------------|-----------------------|-----------------------|-----------------------|
| <b>2016</b>                           | 47.6                  | 51.1                  | 49.3                  |
| <b>2017</b>                           | 48.3                  | 51.4                  | 49.8                  |
| <b>P for trend</b>                    | 0.29                  | 0.59                  | 0.30                  |
| <b>Annual change in years, 95% CI</b> | -0.08 (-0.24 to 0.07) | -0.04 (-0.21 to 0.12) | -0.06 (-0.18 to 0.05) |
| <b>HYPERTENSION</b>                   |                       |                       |                       |
| <b>2008</b>                           | 47.8                  | 50.9                  | 49.4                  |
| <b>2009</b>                           | 47.4                  | 50.7                  | 48.9                  |
| <b>2010</b>                           | 47.0                  | 49.6                  | 48.3                  |
| <b>2011</b>                           | 48.4                  | 50.5                  | 49.4                  |
| <b>2012</b>                           | 48.7                  | 50.5                  | 49.6                  |
| <b>2013</b>                           | 47.8                  | 50.4                  | 49.0                  |
| <b>2014</b>                           | 46.6                  | 49.7                  | 48.1                  |
| <b>2015</b>                           | 46.3                  | 49.9                  | 48.1                  |
| <b>2016</b>                           | 47.3                  | 49.6                  | 48.4                  |
| <b>2017</b>                           | 46.7                  | 50.3                  | 48.4                  |
| <b>P for trend</b>                    | 0.15                  | 0.30                  | 0.08                  |
| <b>Annual change in years, 95% CI</b> | -0.13 (-0.31 to 0.04) | -0.09 (-0.27 to 0.08) | -0.11 (-0.24 to 0.02) |
